1 Unusual Sulfur Requirements  
2 During Laboratory Growth of  
3 *Luteibacter*

4  
5  
6  
7 David A. Baltrus<sup>1,2</sup>  
8 A. Elizabeth Arnold<sup>1,3</sup>  
9

10  
11  
12 <sup>1</sup>School of Plant Sciences, University of Arizona, Tucson AZ 85721

13 <sup>2</sup>School of Animal and Comparative Biomedical Sciences, University of Arizona, Tucson AZ  
14 85721

15 <sup>3</sup>Department of Ecology and Evolutionary Biology, University of Arizona, Tucson AZ, 85721  
16

17 [baltrus@email.arizona.edu](mailto:baltrus@email.arizona.edu)  
18  
19  
20

21 **Abstract**

22

23 Many terrestrial bacteria are assumed to utilize sulfate transport and metabolism as a  
24 means for fulfilling cellular sulfur requirements. As such, many defined minimal media for  
25 bacterial growth under laboratory conditions contain sulfate as their sulfur source. Herein, an  
26 exception to this assumption is described as sulfate transport capabilities have been lost at least  
27 once in a lineage of *Luteibacter* associated with plants and fungi. However, a representative of  
28 this lineage (an endohyphal species, *Luteibacter* sp. 9143) can grow in minimal media when  
29 sulfur is supplemented with organic (cysteine and methionine) or inorganic (thiosulfate)  
30 compounds, and when co-cultured with its fungal host. A related strain of *Luteibacter*  
31 (UNC366Tsa5.1, isolated from the rhizosphere of Arabidopsis) potentially possesses more  
32 limited sulfur acquisition pathways than *Luteibacter* sp. 9143. These results highlight the  
33 surprising sulfur requirements of *Luteibacter*, which may be illustrative of close associations  
34 between these strains and eukaryotes, as well as a need for caution when inferring auxotrophies  
35 in a focal strain based on differential growth in minimal versus rich media.

36

37 **Importance**

38

39 Sulfate is often used as the sulfur source in minimal media. Here we show that some  
40 *Luteibacter* strains cannot utilize sulfate as a sulfur source, likely due to loss of genes encoding  
41 transport proteins. As sulfur requirements for *Luteibacter* can be met through co-culture with  
42 their fungal partner, this knowledge could provide a means to engineer  
43 better symbiotic relationships between bacteria and fungi that may be relevant for agriculture.  
44 Because growth in minimal media can be restored by supplementation with either cysteine or  
45 methionine, and in some cases only methionine, this result highlights how unexpected growth  
46 requirements could masquerade as auxotrophy for certain strains and conditions.

## 47 Introduction

48

49 Sulfur enables critical physiological and chemical interactions within and between cells,  
50 such that it is an essential nutrient required across all life (1). Given the importance of sulfur for  
51 various biochemical processes, it is unsurprising that proteobacteria have evolved diverse  
52 mechanisms to obtain this sometimes limiting element. Even though these pathways range from  
53 scavenging sulfur from inorganic (e.g., sulfates and sulfides) or organic (e.g., cysteine,  
54 methionine, and sulfonates) sources, many proteobacteria are thought to rely on sulfate  
55 transporters CysAUW and CysP to internalize this element (1, 2). The prevalence of sulfate  
56 transport and metabolism has led to sulfur supplementation for a variety of defined growth  
57 media for aerobic bacteria (e.g., M9 and MOPS).

58

59 *Luteibacter* is a genus of Xanthomonadaceae (gammaproteobacteria) that often is found  
60 as a component of plant and fungal microbiomes (3, 4). Although little is known about their  
61 precise ecological functions, some *Luteibacter* strains act as plant growth promoting bacteria,  
62 with some producing phytohormones in partnership with endophytic fungi (5). *Luteibacter* sp.  
63 9143 was isolated originally as an endohyphal bacterium from a foliar endophytic strain of  
64 *Pestalotiopsis* sp. 9143 (Ascomycota) (6). This *Luteibacter* grows readily in culture and has a  
65 facultative association with its fungal host (6).

66

67 When growth of *Luteibacter* sp. 9143 was characterized on different media, it was  
68 observed that this strain grew in rich media and when co-cultured with its fungal host in M9  
69 media, but failed to grow in minimal media when grown axenically, suggestive of auxotrophy.  
70 A combination of selective supplementation, as well as screening of Biolog plates, demonstrates  
71 that this strain is not an auxotroph in the traditional sense. Instead, it cannot utilize sulfate as a  
72 sulfur source during laboratory growth. Further experiments show that *Luteibacter* sp. 9143 can  
73 grow in M9 media if supplemented with cysteine, methionine, or high levels of thiosulfate, or  
74 when co-cultured with its fungal host. Genomic evidence suggests that the requirement for  
75 sulfate-independent sulfur supplementation may be widespread in *Luteibacter*, with some  
76 strains possessing more limited sulfur scavenging capabilities than *Luteibacter* sp. 9143. These  
77 results suggest that strains of *Luteibacter* have evolved a unique metabolic niche for  
78 proteobacteria, potentially reliant on associations with hosts to obtain an essential element for  
79 growth.

80

81

## 82 Methods

83

84 *Strains*

85

86 The focal *Luteibacter* strain used across experiments in this study is DBL564, a rifampicin  
87 resistant isolate of *Luteibacter* sp. 9143 described in Arendt et. al 2016 (6). DBL966 is a rifampicin  
88 resistant isolate of *Luteibacter* sp. UNCMF366Tsu5.1 first described as associated with  
89 *Arabidopsis* by Lundberg et. al (3). This isolate was obtained from the Dangl Lab.

90

#### 91 *Growth Curve Experiments*

92

93 Populations of each *Luteibacter* strain were streaked from frozen stocks to Lysogeny  
94 Broth (LB) agar plates (10g of NaCl per L) supplemented with rifampicin at 50 ng/ $\mu$ L and  
95 grown at 27°C. Prior to the start of each growth curve experiment (below), a single colony was  
96 picked and transferred to 2mL liquid LB media containing rifampicin and grown overnight. All  
97 liquid cultures were grown at 27°C on a rotating shaker (200rpm).

98

99 For fungal co-culture experiments, an isolate of *Pestalotiopsis* sp. 9143 was grown for 1  
100 week in 3mL M9 media on a rotating shaker at 27°C and 200rpm. Mycelium was extracted from  
101 this culture and macerated by shaking with glass beads in 500 $\mu$ L M9, after which 500  $\mu$ L of  
102 additional M9 was added to this tube. A 100 $\mu$ L volume of this resuspension was then added to  
103 10mL M9 with *Luteibacter* sp. 9143 and 2mL aliquots from these master cultures were placed  
104 into 4 test tubes for each treatment. Fungal co-culture experiments were carried out twice  
105 independently, with negative controls treated as the experimental cultures except without the  
106 addition of fungi.

107

108 For bacterial growth curve experiments, 1mL of each culture was pelleted by centrifuge  
109 after overnight growth in LB media, washed twice in 10mM MgCl<sub>2</sub>, and resuspended in 1mL  
110 10mM MgCl<sub>2</sub>. A subset of this resuspension was used to inoculate a master culture for each  
111 experiment as described below. All growth curve experiments were performed in standard M9  
112 media with 4% glucose (i.e., M9). All M9 media contained 2mM MgSO<sub>4</sub>. The base M9 media  
113 was supplemented with additional chemicals where necessary (below). Supplements were  
114 added to a final concentration of either 100 $\mu$ L or 10mM in M9 where indicated, except casamino  
115 acids (Difco), which were added at 0.1% w/v.

116

117 To begin a growth curve, 10mL of M9 media with supplementation was inoculated with  
118 100 $\mu$ L of *Luteibacter* and aliquoted in 2mL increments to test tubes. Bacterial count at the start of  
119 the experiment was measured by plating a dilution series of this inoculum on LB agar plates  
120 supplemented with rifampicin. Cultures were grown for at least 10 days, and cell counts  
121 measured by sampling a small volume (2  $\mu$ L) of each culture and plating a dilution series on LB  
122 agar plates supplemented with rifampicin.

123 *Biolog Assays*

124

125 For Biolog assays, an isolate of strain DBL564 was assayed by technicians at Biolog.  
126 Sulfur utilization was scored as positive if growth profiles in wells of assay exceeded average  
127 height threshold for both independent trials using proprietary software (Biolog, Inc).

128

129 *Data Availability*

130

131 Growth data is available through Figshare at DOI: [10.6084/m9.figshare.5164864](https://doi.org/10.6084/m9.figshare.5164864)

132

133 *Phylogenetics and Genome-wide Comparisons of Sulfur Pathways*

134

135 The complete genome sequence for *Luteibacter* sp. 9143 was described in a previous  
136 publication (7), and all further genomic comparisons took place through the Integrated  
137 Microbial Genomes (IMG) platform (<http://img.jgi.doe.gov>) developed by the JGI (8). Briefly, we  
138 inferred phylogenies using whole genome sequences for both strains investigated as well as  
139 closely related strains with available genomes. The phylogeny was first described in Baltrus et  
140 al. (2017) and shows a consensus maximum likelihood tree built from whole genome SNPs  
141 across the specified genomes using RealPhy (9). Strains marked with an asterisk were used as  
142 reference genomes. Genome annotations for all of these strains were then queried for  
143 annotations involving all KEGG pathways relevant for sulfur metabolism.

144

145 **Results and Discussion**

146

147 *Co-culture with host fungus enables growth of Luteibacter sp. 9143 in M9 media without*  
148 *supplementation*

149

150 In experiments designed to establish a co-culture system for *Luteibacter* sp. 9143 and its  
151 host (*Pestalotiopsis* sp. 9143), we observed that the supernatant of fungal-bacterial cultures in M9  
152 media grew turbid over time under co-culture conditions, but not when bacteria were incubated  
153 axenically (data not shown). Subsequent growth curve experiments (Figure 1A) demonstrated  
154 that viable cell counts for *Luteibacter* sp. 9143 in supernatants increased over time during fungal  
155 co-culture but not in M9 alone. These observations strongly suggested that co-culture with its  
156 host fungus could provide, or provide access to, or more missing nutrients for *Luteibacter* sp.  
157 9143 growth in M9 media.

158

159 *Luteibacter species grow in M9 media supplemented with additional sulfur sources*

160

161 Further growth curve experiments confirmed that *Luteibacter* sp. 9143 was unable to  
162 grow axenically in base M9 media. However, this strain could grow if M9 was supplemented  
163 with casamino acids, suggesting that this strain was auxotrophic for at least one amino acid  
164 (Figure 1B).

165  
166 Supplementation of M9 cultures with combinations of each amino acid within casamino  
167 acids suggested that either methionine or cysteine could support growth of *Luteibacter* sp. 9143  
168 in M9 (data not shown). Growth curves (Figure 1B) demonstrate that *Luteibacter* can grow in M9  
169 media if it is supplemented with either 100 $\mu$ M cysteine or methionine. Growth was apparent  
170 after 10 days in each experiment regardless of treatment, such that day 10 chosen as a setpoint  
171 for further supplementation assays.

172  
173 *Differential abilities of Luteibacter* sp. 9143 to utilize organic and inorganic sulfur sources

174  
175 Given that growth of *Luteibacter* sp. 9143 in M9 was sensitive to amino acids that contain  
176 sulfur, the production of which are often interconnected (1), the strain appears not to be a true  
177 auxotroph in the traditional sense. Unlike what is commonly assumed for culturable  
178 proteobacteria (1), *Luteibacter* sp. 9143 cannot utilize sulfate as a sulfur source.

179  
180 Following up on these experiments, a variety of other sulfur sources were tested for  
181 their ability to supplement *Luteibacter* growth in M9 media. Serine was included because its  
182 structure is similar to cysteine. None of the assayed compounds, other than methionine and  
183 cysteine, could support growth of *Luteibacter* at 100 $\mu$ M (Figure 2A). However, sodium  
184 thiosulfate supported growth when supplemented at 10mM (Figure 2B). Thus *Luteibacter* sp.  
185 9143 can utilize organic sulfur sources like cysteine or methionine for growth under natural  
186 conditions, but can use thiosulfate if concentrations are high enough.

187  
188 The ability of *Luteibacter* sp. 9143 to utilize a variety of sulfur sources was assayed  
189 independently using Biolog phenotype array plates (Table 1 and Supplemental file 1). Data  
190 from two independent Biolog assays supported growth curve data, in that they showed that  
191 *Luteibacter* sp. 9143 could utilize both cysteine and thiosulfate as sulfur sources. The assays also  
192 showed that this strain could utilize Djenkolic acid, lipoamide, and lanthionine. In contrast to  
193 growth curve data, Biolog assays did not reliably support the ability of *Luteibacter* sp. 9143 to  
194 utilize methionine as a sulfur source (see report, on Figshare, at DOI:  
195 [10.6084/m9.figshare.5134852](https://doi.org/10.6084/m9.figshare.5134852)). We note, however, that activity of *Luteibacter* in multiple  
196 alternative sulfur sources does appear to be higher than that in sulfate according to the Biolog  
197 data. However, these substrates didn't exceed the "average height" threshold according to  
198 Biolog's proprietary software and therefore weren't scored as positive growth.

199  
200  
201  
202  
203  
204  
205  
206  
207  
208  
209  
210  
211  
212  
213  
214  
215  
216  
217  
218  
219  
220  
221  
222  
223  
224  
225  
226  
227  
228  
229  
230  
231  
232  
233  
234  
235  
236

*Genomic Comparisons Suggest that a Clade of Luteibacter Has Lost the Ability to Import Sulfate*

JGI's IMG server was used for pathway function analysis across *Luteibacter* genomes with genomes for *Dyella* and *Xanthomonas* as outgroups. The main genes responsible for sulfate transport in proteobacteria (*cysAUW* and *cysP/sbp*) are present in both outgroups and a subset of *Luteibacter* species, but are absent from the genomes of all strains found as endohyphal bacteria (Figure 3). These genes also are absent from the genomes of a clade of *Luteibacter* strains isolated from *Arabidopsis* roots. The most parsimonious interpretation of this pattern is that *cysAUWP* were lost independently from both clades of *Luteibacter*, or that they were lost in an ancestor of *Luteibacter* and reacquired by strains including *L. rhizoxinicus*. Either scenario would require two independent events (i.e., two losses of *cysAUWP* or one loss and one gain of *cysAUWP*).

Genome comparisons suggested that other *Luteibacter* strains also would require a sulfur source other than sulfate for growth (Figure 3). Therefore, growth requirements of a rifampicin resistant mutant of *Luteibacter* sp. UNCMF366Tsu5.1 were assayed in M9 media alone and supplemented with sulfur sources shown to promote growth of *Luteibacter* sp. 9143.

Surprisingly, although *Luteibacter* sp. UNCMF366Tsu5.1 was able to grow in M9 supplemented with methionine, it was not able to grow in M9 supplemented with cysteine or thiosulfate (Figure 4). Two alternative, and not necessarily mutually exclusive, explanations could account for this differential growth behavior. First, transport and sulfur utilization for methionine could occur independently from that of cysteine and thiosulfate in these strains, and the latter could be missing from *Luteibacter* sp. UNCMF366Tsu5.1. Second, *Luteibacter* sp. UNCMF366Tsu5.1 may be more sensitive to reactive effects of cysteine and high levels of thiosulfate. Consistent population sizes (rather than cell death) of *Luteibacter* sp. UNCMF366Tsu5.1 in M9 with cysteine supports the first possibility and argues against the second, but a definitive answer cannot be reached from these data alone. Differential growth of *Luteibacter* strains also argues against contamination as the reason *Luteibacter* sp. 9143 could grow in 10mM but not 100 $\mu$ M thiosulfate. It should be noted that, if *Luteibacter* sp. UNCMF366Tsu5.1 was assayed before *Luteibacter* sp. 9143, a natural conclusion would be that this strain was a methionine auxotroph. While this may be true, a more likely possibility is that *Luteibacter* sp. UNCMF366Tsu5.1 has a more limited sulfur scavenging capability than *Luteibacter* sp. 9143.

*Sulfur Acquisition by Luteibacter Under Natural Growth Conditions*

237 At a minimum, sulfur is required for growth of all known bacteria under all known  
238 conditions because it is a main component of an amino acid (methionine) present in all  
239 translated proteins (1). Sulfate is one of the most widely available and utilized sulfur sources for  
240 terrestrial bacteria, which is highlighted by conservation of the sulfate transport pathway genes  
241 *cysAUWP* across many proteobacteria, including xanthomonads (10). That certain clades of  
242 *Luteibacter* have altered abilities to metabolize sulfate compared to closely related outgroups like  
243 *Xanthomonas* speaks to a distinctive ecological niche for these strains compared to their more  
244 widely studied relatives.

245  
246 For both *Luteibacter* sp. 9143 and UNC366Tsa5.1, sulfur may be acquired through close  
247 relationships with fungi and/or plants, rather than from other environmental sources. While  
248 sulfur concentrations are thought to be relatively low inside of plants compared to the  
249 surrounding environment (1), these strains could be adapted to scavenging free amino acids or  
250 other organic sulfur-containing compounds provided by eukaryotic hosts.

251  
252 Aside from potentially available plant-derived sulfur containing compounds like  
253 proteins containing cysteine and methionine, sulpholipids are a main component of plant cells  
254 and potentially could be used as a sulfur source by these bacteria (11). *Luteibacter* sp.  
255 UNCMF366Tsa5.1 was isolated from the rhizosphere of *Arabidopsis*, but it is possible that this  
256 strain was closely associated with fungi in proximity to plant roots (3).

257  
258 Lastly, we note that *Mycoavidus cysteinexigens*, a symbiont of the fungus *Mortierella*  
259 *elongata*, has lost pathways for the production of cysteine and is therefore a true auxotroph for  
260 this amino acid (12). While this is clearly an independent evolutionary event relative to loss of  
261 sulfate transport in *Luteibacter* sp., it is intriguing that pathways related to sulfur metabolism  
262 have been the targets of repeated modifications in endofungal bacteria. Although evolutionary  
263 drivers of this pattern are unclear at present, production of sulfur containing molecules during  
264 plant defense responses (13) or by fungi themselves (14) could enable loss of pathways involved  
265 in sulfur acquisition for these bacterial lineages.

266  
267 Alteration of pathways for sulfur metabolism and acquisition due to availability of  
268 sources other than sulfate has been demonstrated multiple times in aquatic bacteria (15-17). It is  
269 hypothesized that an abundance of dimethylsulphoniopropionate (DMSP), supplied by other  
270 marine microbes, enabled the loss of sulfur transporters (18, 19). In some cases, DMSP can be  
271 supplied by eukaryotes (e.g., the diatom *Thalassiosira pseudonana*, which forms close  
272 relationships with the marine bacteria *Ruegeria pomeroyi*) (20). The assays described here  
273 showed that *Luteibacter* sp. 9143 fails to use DMSP as a sulfur source under lab conditions  
274 (Figure 2). That sulfate transport has been lost under such a variety of conditions speaks to a



275 potentially significant evolutionary or metabolic cost associated with maintenance of sulfate  
276 assimilation pathways.

277

278 *Conclusions*

279

280 The experiments presented here demonstrate that certain *Luteibacter* strains have lost  
281 commonly found pathways that enable utilization of sulfate as a sulfur source. Sulfur  
282 acquisition by these strains under natural conditions potentially requires access to organic  
283 sulfur such as that provided by hosts, which further suggests that symbiosis is a key component  
284 of the ecological niche for this subset of strains. These results also suggest that one should be  
285 cautious when interpreting differential growth of a focal bacterial strain in rich compared to  
286 minimal media as auxotrophy, as strains of interest may have different growth requirements in  
287 minimal media than would be commonly assumed based on knowledge of closely related  
288 strains.

289

290 **Acknowledgements**

291

292 We thank Kayla Arendt, Kevin Hockett, and Paul Carini for advice with experiments and  
293 interpretation. Financial support was provided by the National Science Foundation (NSF IOS-  
294 1354219 to D. A. B., A.E.A., and Rachel E. Gallery).

295

296

297

298

299

300

301 **References**

- 302 1. Sekowska A, Kung HF, Danchin A. 2000. Sulfur metabolism in *Escherichia coli* and related  
303 bacteria: facts and fiction. *J Mol Microbiol Biotechnol* 2:145–177.
- 304 2. Kertesz MA. 2001. Bacterial transporters for sulfate and organosulfur compounds. *Res*  
305 *Microbiol* 152:279–290.
- 306 3. Lundberg DS, Lebeis SL, Paredes SH, Yourstone S, Gehring J, Malfatti S, Tremblay J,  
307 Engelbrekton A, Kunin V, del Rio TG, Edgar RC, Eickhorst T, Ley RE, Hugenholtz P,  
308 Tringe SG, Dangl JL. 2012. Defining the core *Arabidopsis thaliana* root microbiome. *Nature*  
309 488:86–90.
- 310 4. Hoffman MT, Arnold AE. 2010. Diverse bacteria inhabit living hyphae of phylogenetically  
311 diverse fungal endophytes. *Appl Environ Microbiol* 76:4063–4075.
- 312 5. Hoffman MT, Gunatilaka MK, Wijeratne K, Gunatilaka L, Elizabeth Arnold A. 2013.  
313 Endohyphal Bacterium Enhances Production of Indole-3-Acetic Acid by a Foliar Fungal  
314 Endophyte. *PLoS One* 8:e73132.
- 315 6. Arendt KR, Hockett KL, Araldi-Brondolo SJ, Baltrus DA, Arnold AE. 2016. Isolation of  
316 Endohyphal Bacteria from Foliar Ascomycota and In Vitro Establishment of Their  
317 Symbiotic Associations. *Appl Environ Microbiol* 82:2943–2949.
- 318 7. Baltrus DA, Dougherty K, Arendt KR, Huntemann M, Clum A, Pillay M, Palaniappan K,  
319 Varghese N, Mikhailova N, Stamatis D, Reddy TBK, Ngan CY, Daum C, Shapiro N,

- 320 Markowitz V, Ivanova N, Kyrpides N, Woyke T, Arnold AE. 2017. Absence of genome  
321 reduction in diverse, facultative endohyphal bacteria. *Microb Genom* 3:e000101.
- 322 8. Markowitz VM, Mavromatis K, Ivanova NN, Chen I-MA, Chu K, Kyrpides NC. 2009. IMG  
323 ER: a system for microbial genome annotation expert review and curation. *Bioinformatics*  
324 25:2271–2278.
- 325 9. Bertels F, Silander OK, Pachkov M, Rainey PB, van Nimwegen E. 2014. Automated  
326 reconstruction of whole-genome phylogenies from short-sequence reads. *Mol Biol Evol*  
327 31:1077–1088.
- 328 10. Pereira CT, Moutran A, Fessel M, Balan A. 2015. The sulfur/sulfonates transport systems in  
329 *Xanthomonas citri* pv. *citri*. *BMC Genomics* 16:524.
- 330 11. Collier R, Kennedy GY. 1963. The sulpholipids of plants I. The distribution of sulpholipids  
331 and phospholipids among the major plant classes. *J Mar Biol Assoc U K* 43:605.
- 332 12. Uehling J, Gryganskyi A, Hameed K, Tschaplinski T, Misztal PK, Wu S, Desirò A, Vande Pol  
333 N, Du Z, Zienkiewicz A, Zienkiewicz K, Morin E, Tisserant E, Splivallo R, Hainaut M,  
334 Henrissat B, Ohm R, Kuo A, Yan J, Lipzen A, Nolan M, LaButti K, Barry K, Goldstein AH,  
335 Labbé J, Schadt C, Tuskan G, Grigoriev I, Martin F, Vilgalys R, Bonito G. 2017. Comparative  
336 genomics of *Mortierella elongata* and its bacterial endosymbiont *Mycoavidus*  
337 *cysteinexigens*. *Environ Microbiol*.
- 338 13. Bloem E, Haneklaus S, Schnug E. 2014. Milestones in plant sulfur research on sulfur-  
339 induced-resistance (SIR) in Europe. *Front Plant Sci* 5:779.

- 340 14. Strobel G, Ford E, Harper JK. March 2007. Pestalotiopsis microsporia isolates and  
341 compounds derived therefrom. 7192939. US Patent.
- 342 15. Tripp HJ, Kitner JB, Schwalbach MS, Dacey JWH, Wilhelm LJ, Giovannoni SJ. 2008. SAR11  
343 marine bacteria require exogenous reduced sulfur for growth. Nature 452:741–744.
- 344 16. Smith DP, Nicora CD, Carini P, Lipton MS, Norbeck AD, Smith RD, Giovannoni SJ. 2016.  
345 Proteome Remodeling in Response to Sulfur Limitation in “Candidatus Pelagibacter  
346 ubique.” mSystems 1.
- 347 17. González JM, Kiene RP, Moran MA. 1999. Transformation of sulfur compounds by an  
348 abundant lineage of marine bacteria in the alpha-subclass of the class Proteobacteria. Appl  
349 Environ Microbiol 65:3810–3819.
- 350 18. Reisch CR, Moran MA, Whitman WB. 2011. Bacterial Catabolism of  
351 Dimethylsulfoniopropionate (DMSP). Front Microbiol 2:172.
- 352 19. Moran MA, Reisch CR, Kiene RP, Whitman WB. 2012. Genomic insights into bacterial DMSP  
353 transformations. Ann Rev Mar Sci 4:523–542.
- 354 20. Durham BP, Sharma S, Luo H, Smith CB, Amin SA, Bender SJ, Dearth SP, Van Mooy BAS,  
355 Campagna SR, Kujawinski EB, Armbrust EV, Moran MA. 2015. Cryptic carbon and sulfur  
356 cycling between surface ocean plankton. Proc Natl Acad Sci U S A 112:453–457.

357  
358  
359

360 **Figure 1. *Luteibacter* sp. 9143 Requires Sulfur Sources Other than Sulfate During Laboratory**  
361 **Growth.** A) Representative growth curves of axenic *Luteibacter* sp. 9143 in M9 (triangles) or co-  
362 cultured with its host fungus, the foliar endophyte *Pestalotiopsis* sp. 9143 (circles). Four cultures  
363 were grown in each case, and bacterial population sizes in the supernatant were sampled and  
364 averaged at times indicated. B) Growth curves of axenic *Luteibacter* sp. 9143 in M9 media  
365 (circles), or supplemented with 100uM methionine (pluses), 100  $\mu$ M cysteine (squares), or  
366 casamino acids (triangles). Each point shows the average from 8 replicates (over two different  
367 experiments) for each treatment combination. In all cases, error bars represent +/- one standard  
368 error.

369  
370 **Figure 2. Cysteine, Methionine, and Thiosulfate Can Be Utilized as Sulfur Sources by**  
371 ***Luteibacter* sp. 9143.** Plots show each data point for *Luteibacter* sp. 9143 cultures sampled at day  
372 0 (white plot) and the same cultures sampled at day 10 (grey plot) in M9 supplemented with a  
373 variety of sulfur sources or serine. In each case, population sizes were sampled for each culture  
374 on both days. A) Cultures supplemented at 100 $\mu$ M with 0.1% w/v casamino acids (Cas), cysteine  
375 (Cys), DMSF, thiosulfate (Thio), serine (Ser), or unsupplemented (M9). B) Cultures  
376 supplemented at 10mM, with the only difference in treatment being methionine (Met) instead of  
377 cysteine. Error bars represent +/- one standard error.

378  
379 **Figure 3. Multiple *Luteibacter* Strains Have Lost Ability to Transport Sulfate.** A maximum  
380 likelihood phylogeny built using whole genome sequences from *Luteibacter* strains and related  
381 species, with methods explained in (7). Phylogeny was built in RealPHY using genomes listed  
382 here with an asterisk as references. Box on right shows presence (grey) or absence (white) of  
383 genes involved in sulfur utilization from the listed genomes as annotated in IMG. KEGG  
384 classifiers for each gene are shown at top of each column while gene names or descriptors are  
385 shown at bottom. Genes involved in sulfur acquisition, but which have no representatives in the  
386 queried genomes, are not shown in the matrix. Numbers inside boxes indicate that multiple  
387 copies of this gene(s) are found within the genome.

388  
389 **Figure 4. Phenotypic Diversity of Sulfur Utilization Across *Luteibacter* Strains.** Plots show  
390 each data point for *Luteibacter* sp. 9143 (DBL564) and *Luteibacter* sp. UNCMF366Tsu5.1 (DBL966)  
391 in M9 supplemented with a variety of sulfur sources. The same cultures were sampled at day 0  
392 (white plot) and day 10 (grey plot). Methionine and cysteine were supplemented at 100 $\mu$ M.  
393 Thiosulfate was supplemented at 10mM. Error bars represent +/- one standard error.

394  
395

396

|               |                  |
|---------------|------------------|
| D-Cysteine    | L-Cysteine       |
| Thiosulfate   | D,L-Lipoamide    |
| Cystathionine | L-Djenkolic acid |
| Cys-Gly       | Lanthionine      |

\*Defined as activity greater than the "average height" threshold in two separate trials. See full report at <https://figshare.com/s/6d348e7e73a478f966d1>

397

A)

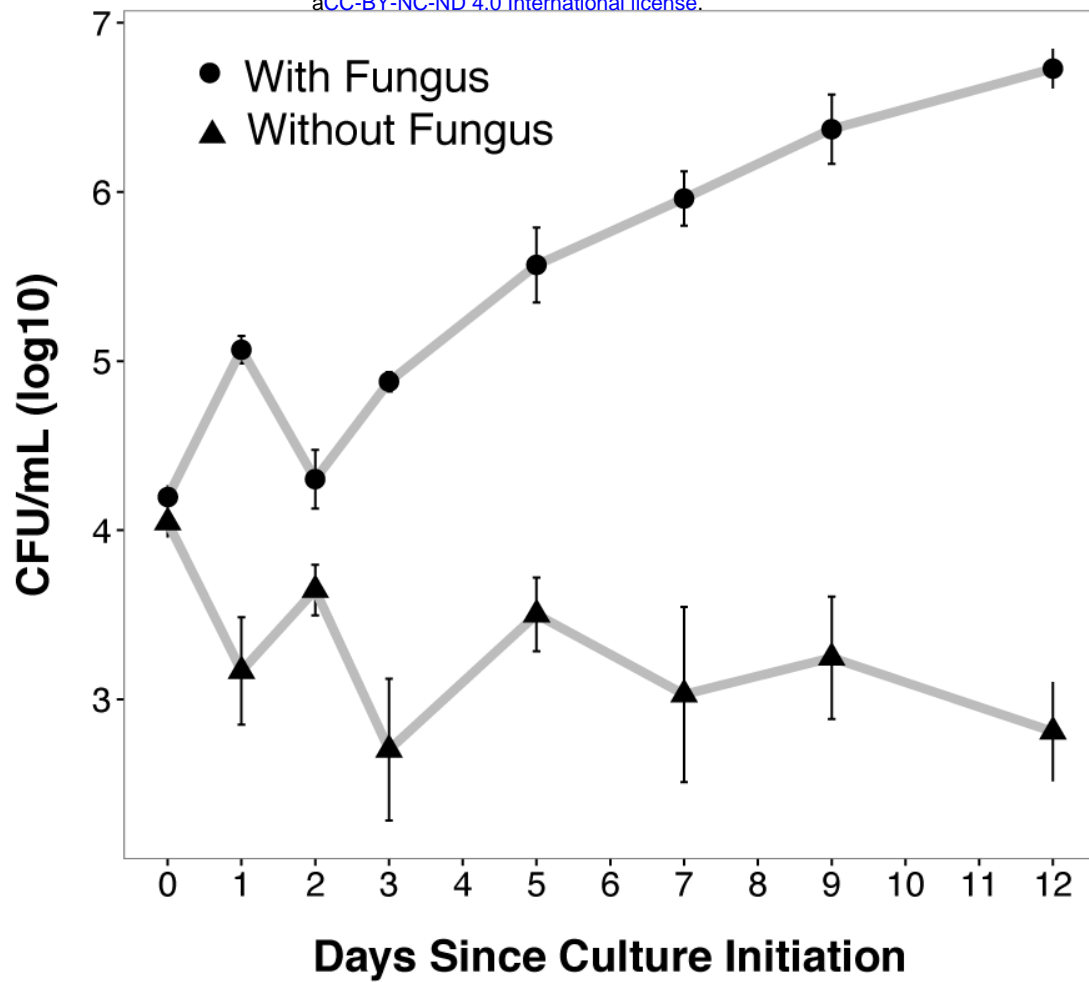

B)

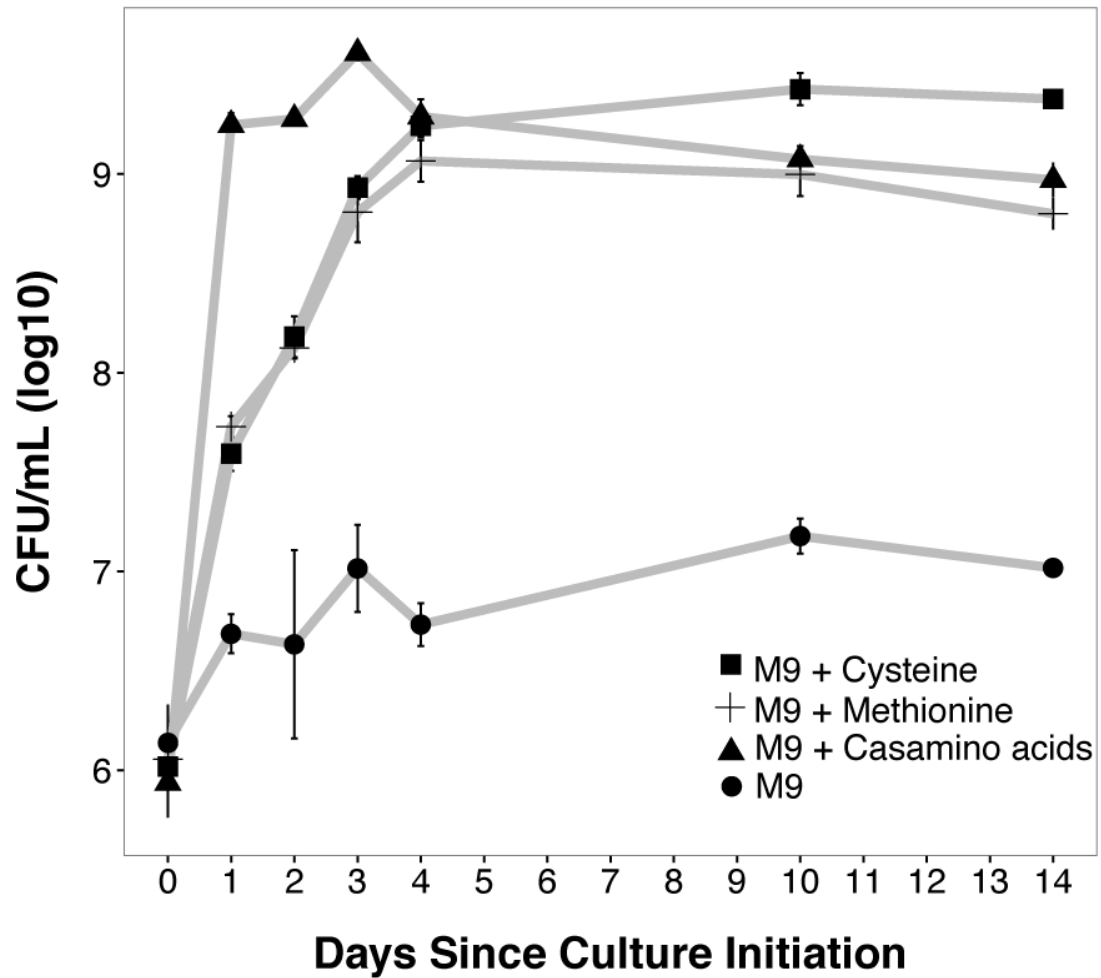

A)

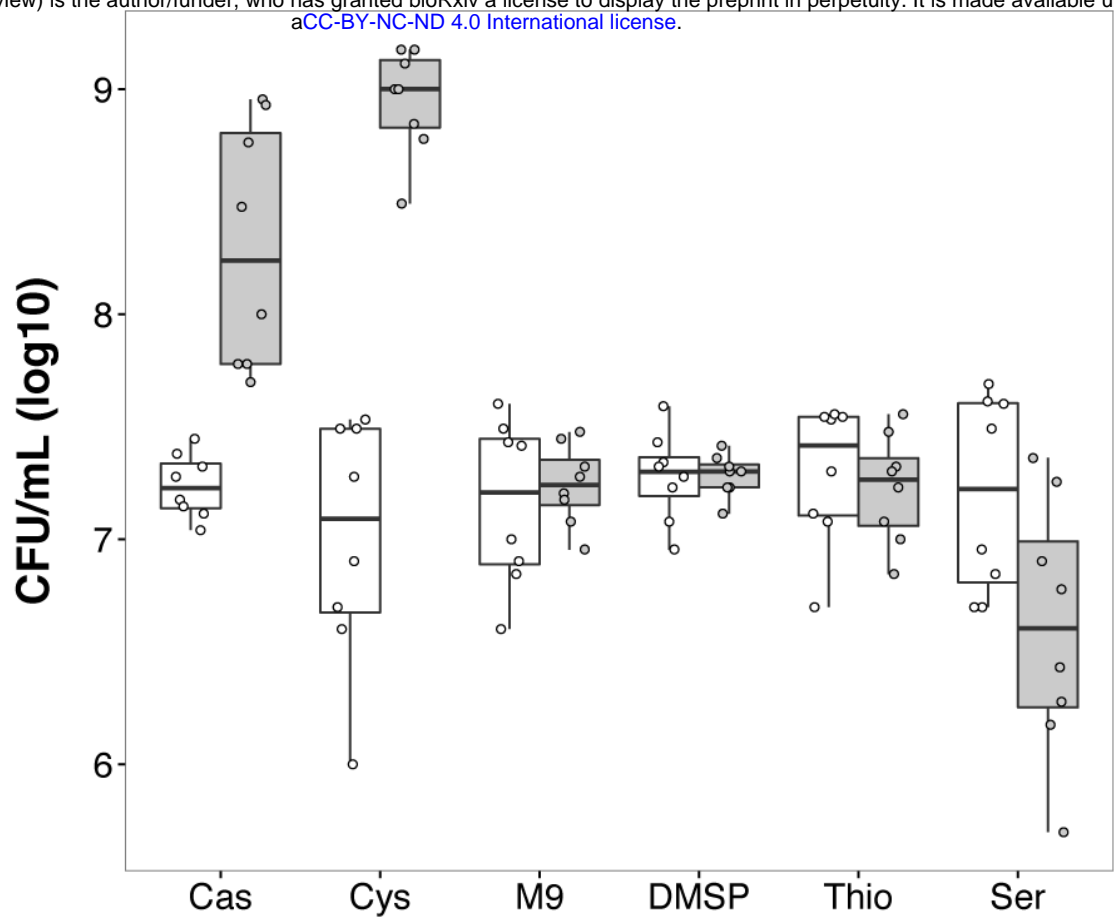

B)

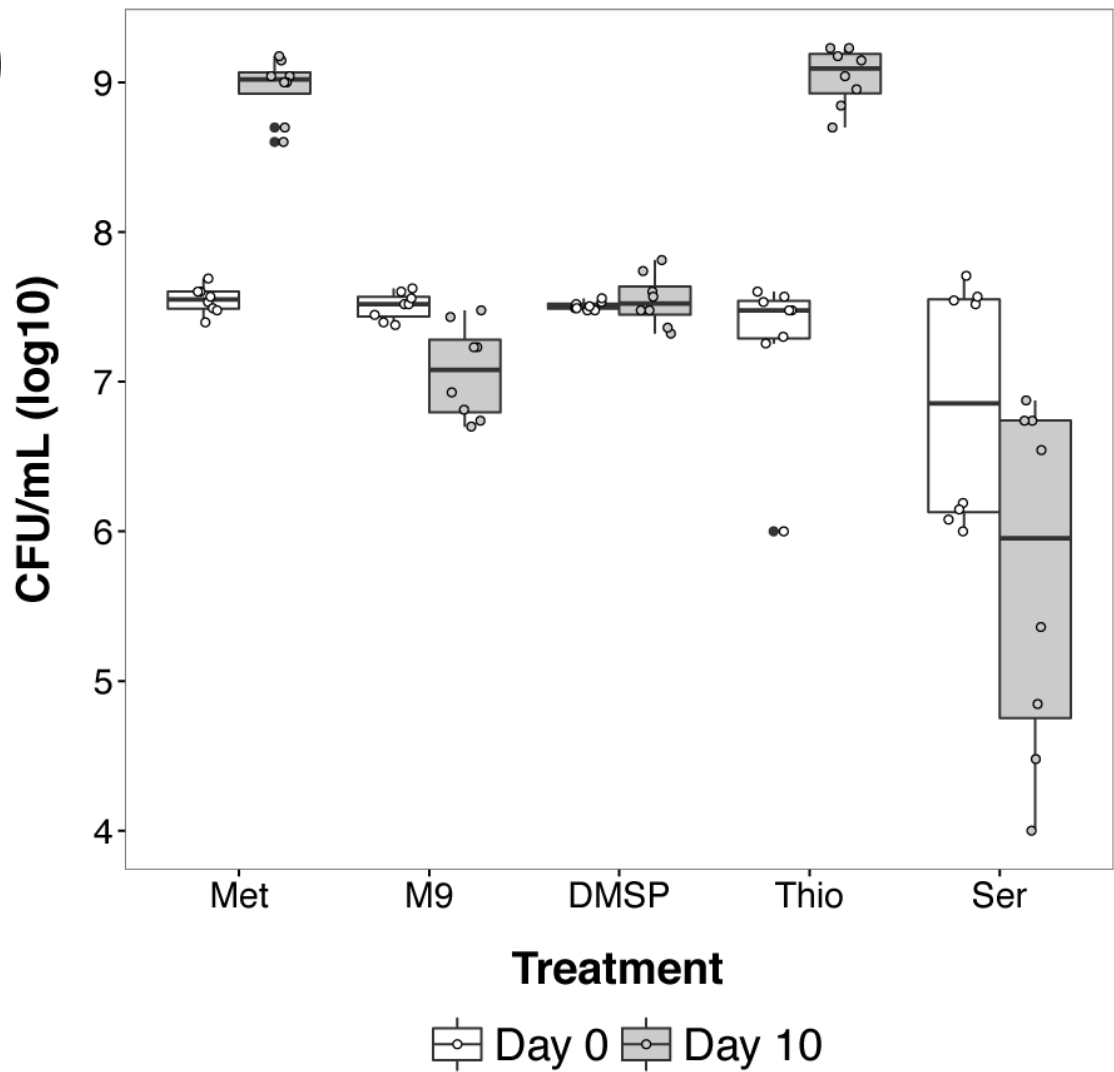





**CFU/mL (log<sub>10</sub>)**

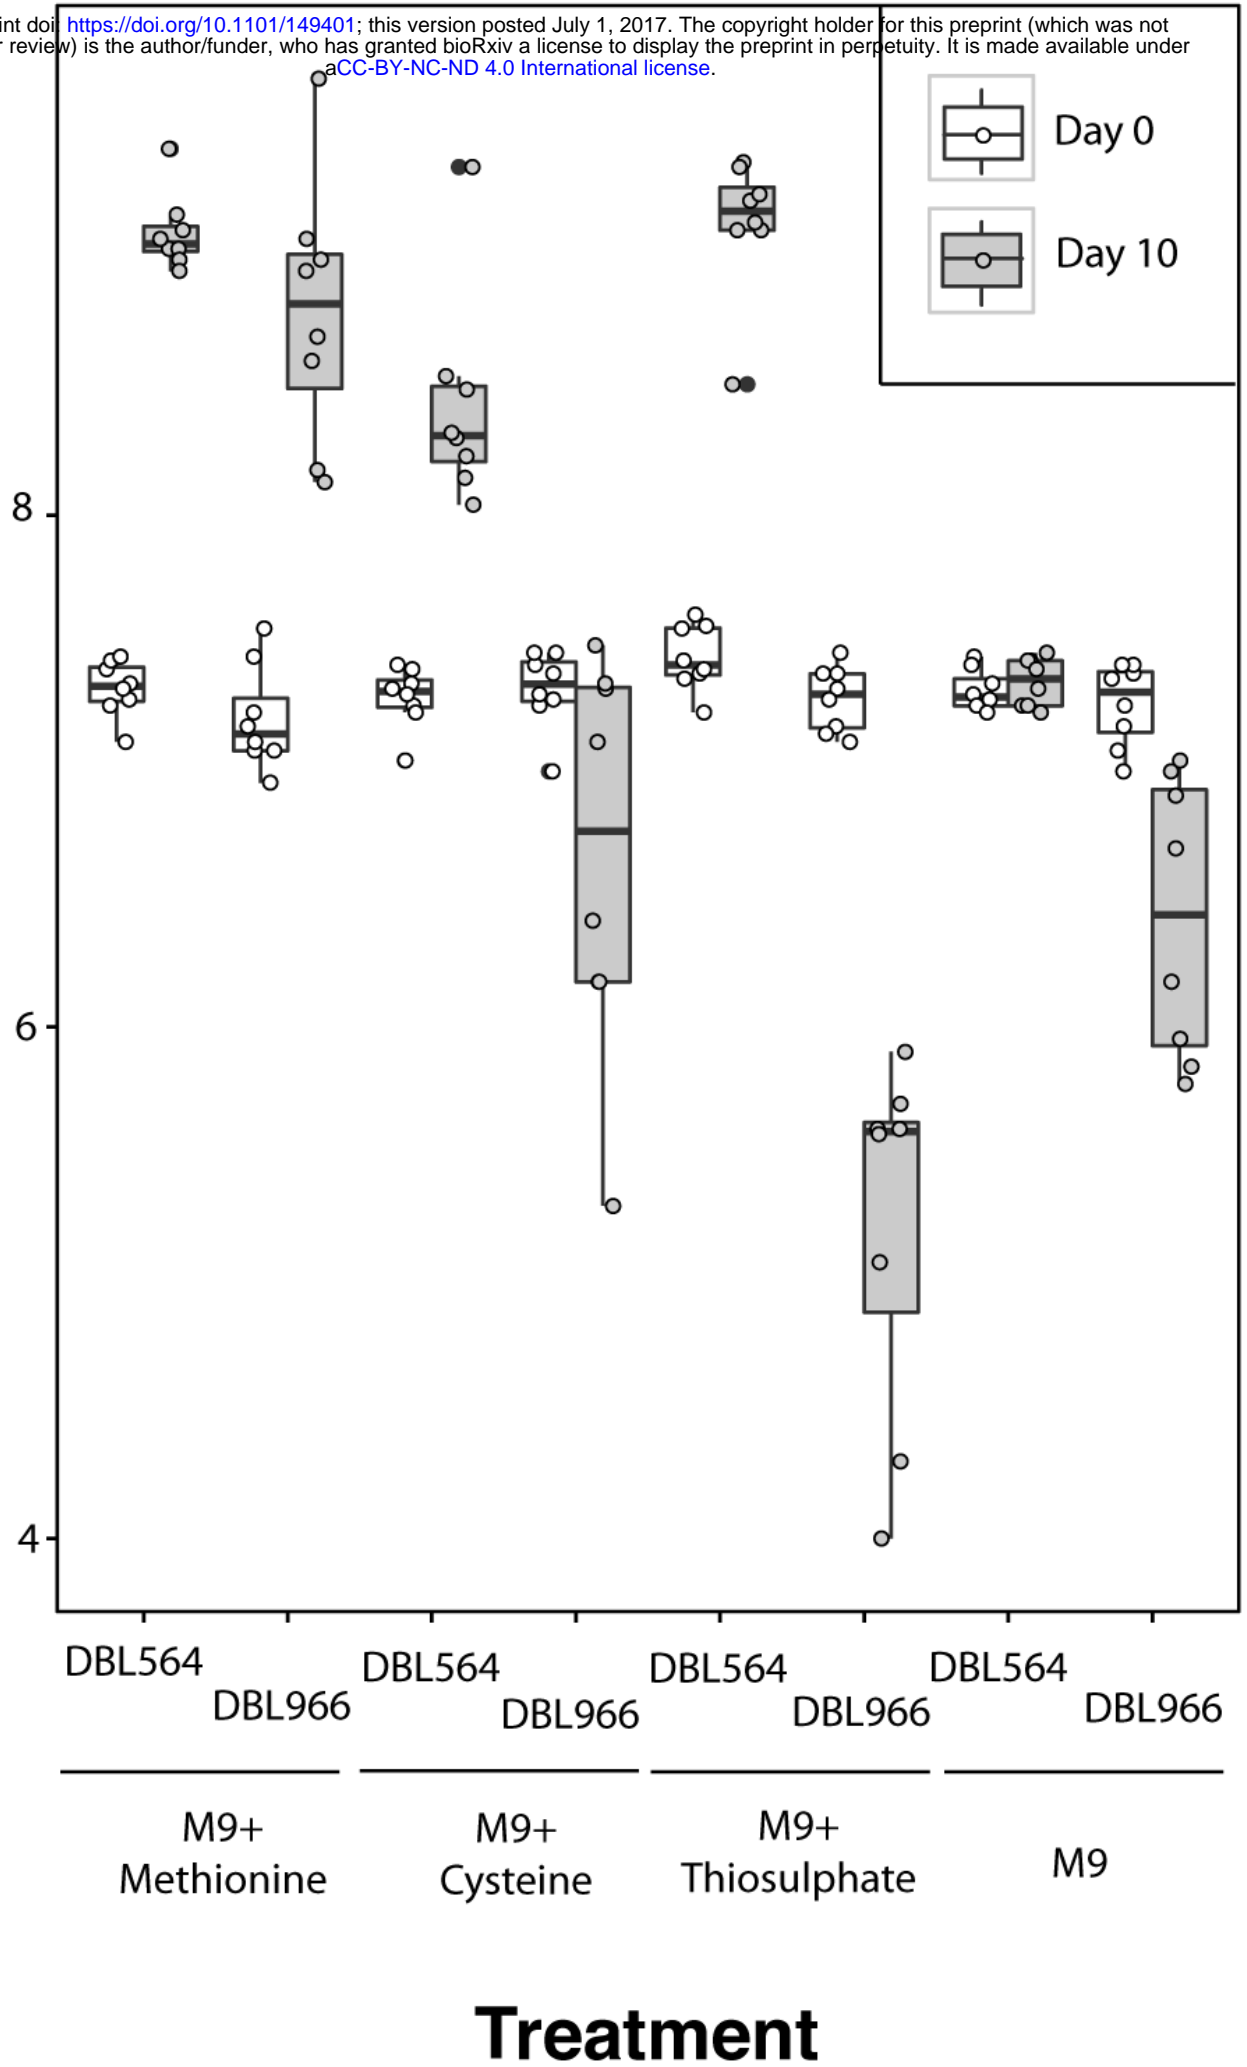

Source: https://www.biorxiv.org/content/10.1101/149401v3.full.pdf
